# Supplementary material for: Nano-structured magneto-responsive membranes from block copolymers and iron oxide nanoparticles
Source: Royal Society of Chemistry journal article supplement (doi:10.1039/c6py01870j), 2016-11-28
Supplement: c6py01870j1.pdf [file c6py01870j1.pdf]

## SUPPORTING INFORMATION

### Nano-structured magneto-responsive membranes from block copolymer aggregates and functionalized iron oxide nanoparticles

Lakshmeesha Upadhyaya<sup>a,d,e</sup>, Mona Semsarilar<sup>a\*</sup>, Rodrigo Fernández-Pacheco<sup>b</sup>, Gema Martínez<sup>c,d</sup>, Reyes Mallada<sup>d</sup>, Isabel M. Coelho<sup>e</sup>, Carla A. M. Portugal<sup>e</sup>, João G. Crespo<sup>e</sup>, André Deratani<sup>a</sup>, Damien Quemener<sup>a</sup>

<sup>a</sup> Institut Européen des Membranes/ Université de Montpellier, Place E.Bataillon CC047, 34095 Montpellier, France

<sup>b</sup> Laboratorio de Microscopías Avanzadas (LMA), Instituto de Nanociencia de Aragón (INA), Edificio I+D, Campus Río Ebro. Universidad de Zaragoza, 50018, Zaragoza Spain

<sup>c</sup> Networking Research Centre on Bioengineering, Biomaterials and Nanomedicine, CIBER-BBN, 28029 Madrid, Spain

<sup>d</sup> Department of Chemical and Environmental Engineering and Aragon Nanoscience Institute, Campus Río Ebro, C/ Mariano Esquillor s/n ,50018 Zaragoza, Spain

<sup>e</sup> LAQV- REQUIMTE, Departamento de Química, Faculdade de Ciências e Tecnologia, Universidade Nova de Lisboa, Campus de Caparica, 2829-516 Caparica, Portugal

**Table S1:** Particle diameter measured using dynamic light scattering.

| Volume of bad solvent added (mL)                                | Hydrodynamic diameter (nm)<br>(By number average and not by intensity or volume) | PDI from DLS |
|-----------------------------------------------------------------|----------------------------------------------------------------------------------|--------------|
| <b>Water pH 7</b>                                               |                                                                                  |              |
| 0.1                                                             | 102.0                                                                            | 0.19         |
| 0.2                                                             | 142.3                                                                            | 0.22         |
| 0.3                                                             | 158.5                                                                            | 0.28         |
| 0.4                                                             | 161.7                                                                            | 0.36         |
| 0.5                                                             | 165.3                                                                            | 0.41         |
| 0.6                                                             | 169.5                                                                            | 0.42         |
| 0.7                                                             | 171.1                                                                            | 0.45         |
| 0.8                                                             | 182.9                                                                            | 0.41         |
| 0.9                                                             | 184.3                                                                            | 0.42         |
| <b>PMAA<sub>47</sub> coated particles</b>                       |                                                                                  |              |
| 0.1                                                             | 96.3                                                                             | 0.12         |
| 0.2                                                             | 99.3                                                                             | 0.18         |
| 0.3                                                             | 111.3                                                                            | 0.31         |
| 0.4                                                             | 123.4                                                                            | 0.26         |
| 0.5                                                             | 138.9                                                                            | 0.21         |
| 0.6                                                             | 148.9                                                                            | 0.28         |
| 0.7                                                             | 151.3                                                                            | 0.31         |
| 0.8                                                             | 162.3                                                                            | 0.38         |
| 0.9                                                             | 189.3                                                                            | 0.41         |
| <b>PMAA<sub>47</sub>-PQDMAEMA<sub>50</sub> coated particles</b> |                                                                                  |              |
| 0.1                                                             | 78.3                                                                             | 0.11         |

|                              |       |      |
|------------------------------|-------|------|
| 0.2                          | 123.3 | 0.24 |
| 0.3                          | 167.6 | 0.28 |
| 0.4                          | 183.4 | 0.18 |
| 0.5                          | 198.9 | 0.38 |
| 0.6                          | 228.6 | 0.31 |
| 0.7                          | 241.8 | 0.38 |
| 0.8                          | 268.9 | 0.37 |
| 0.9                          | 321.6 | 0.31 |
| <b>DMSA coated particles</b> |       |      |
| 0.1                          | 122.3 | 0.26 |
| 0.2                          | 189.6 | 0.22 |
| 0.3                          | 228.9 | 0.32 |
| 0.4                          | 238.5 | 0.28 |
| 0.5                          | 289.6 | 0.41 |
| 0.6                          | 341.3 | 0.42 |
| 0.7                          | 328.9 | 0.39 |
| 0.8                          | 358.6 | 0.45 |
| 0.9                          | 371.3 | 0.36 |

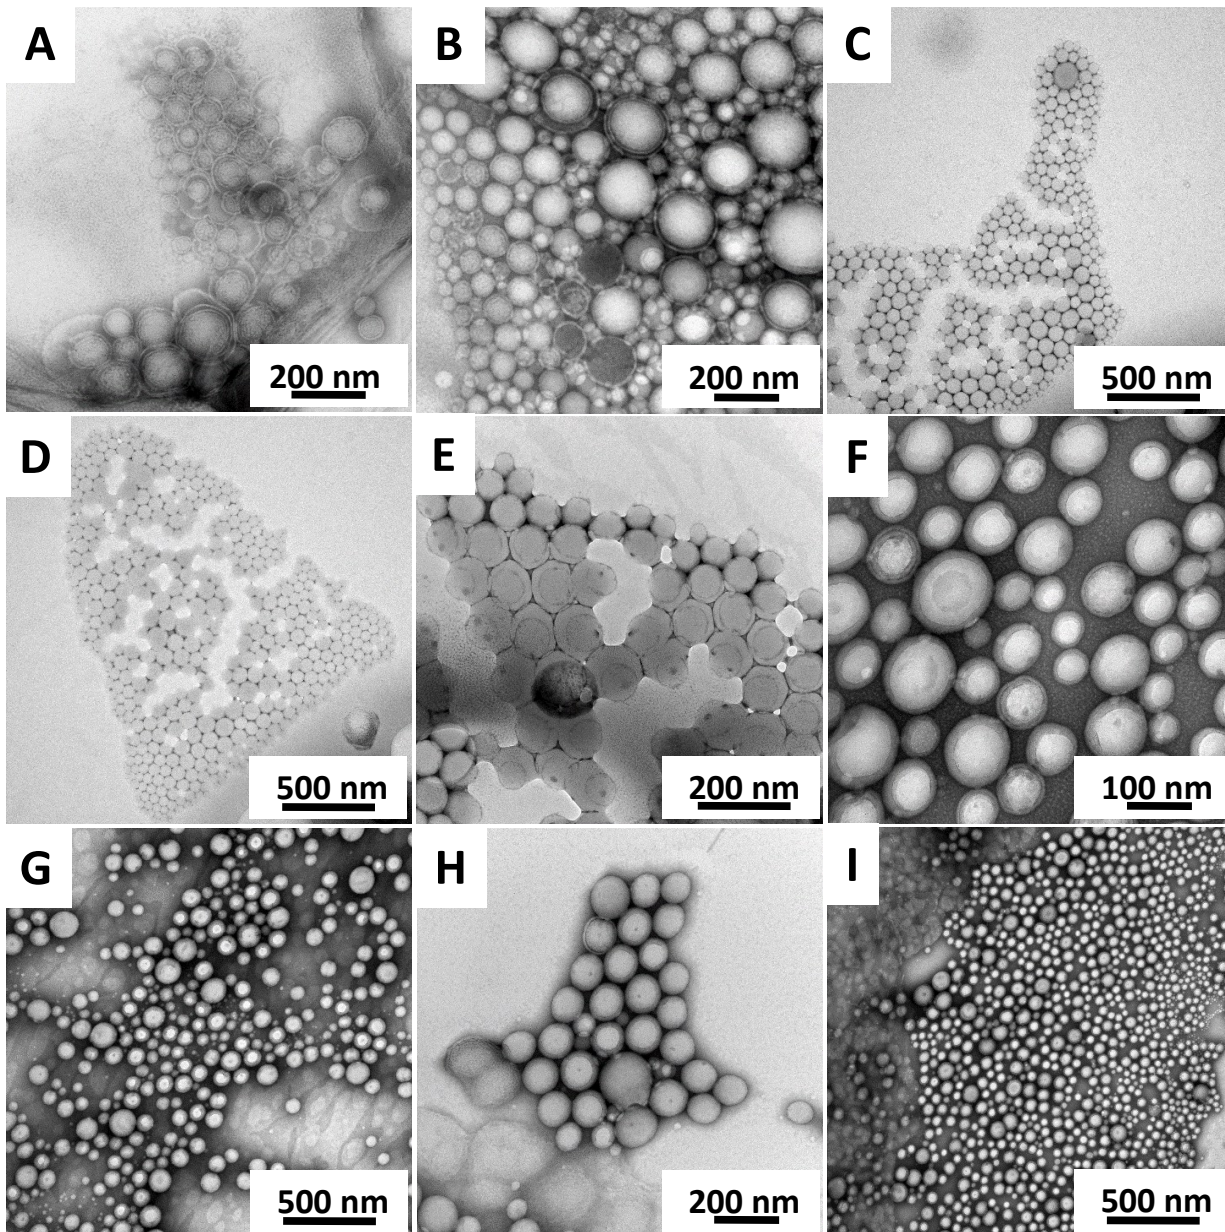

**Figure S1.** TEM images of nanoparticles prepared from addition of (A) 0.1 mL (B) 0.2 mL (C) 0.3 mL (D) 0.4 mL (E) 0.5 mL (F) 0.6 mL (G) 0.7 mL (H) 0.8 mL (I) 0.9 of water to 1 mL of PMAA<sub>47</sub>-*b*-PMMA<sub>69</sub> solution in THF at 20 w/w %.

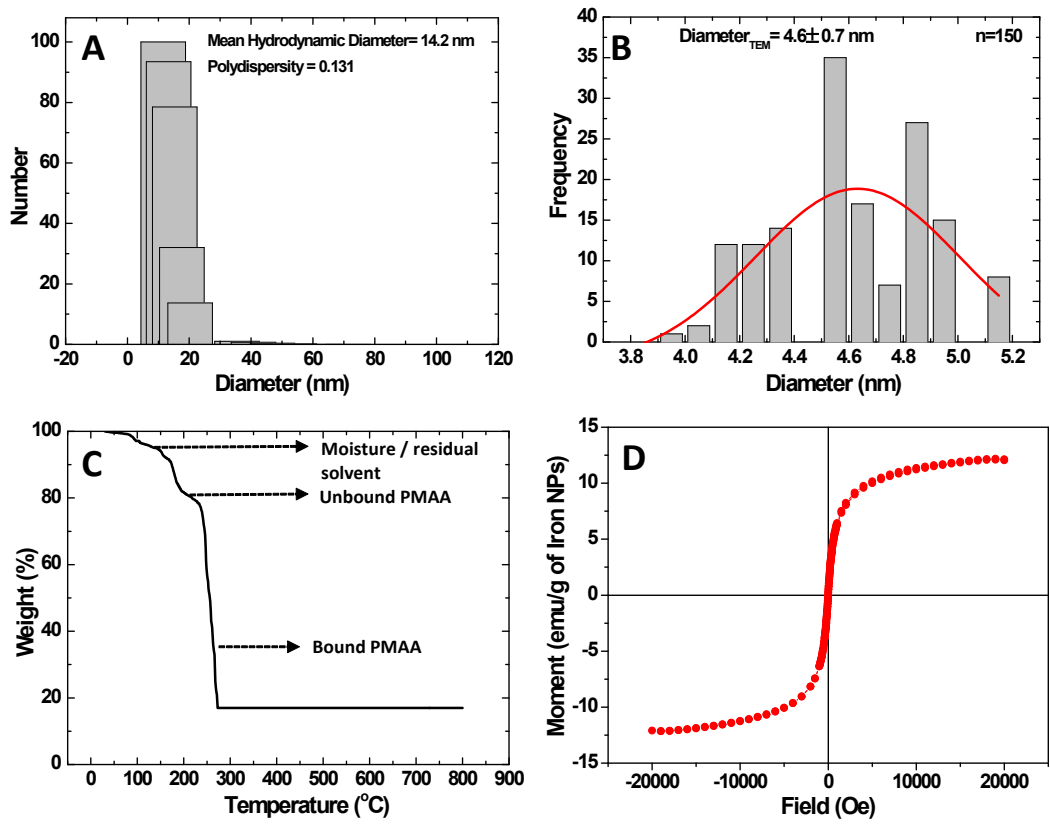

|                      |       |                              |            |
|----------------------|-------|------------------------------|------------|
| PMAA composition     | 78.2% | Saturation Magnetisation, Ms | 12.7 emu/g |
| Iron Nps composition | 21.8% | Coercivity, Hc               | 3.1 Oe     |

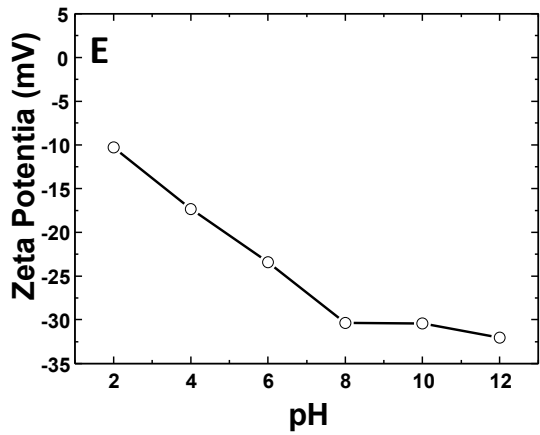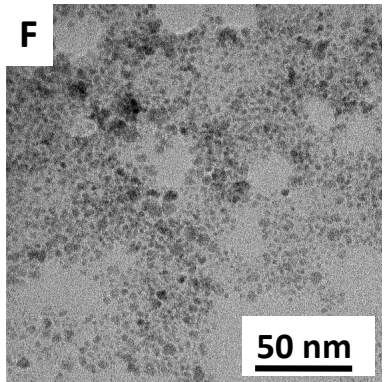

**Figure S2.** Characterization of PMAA<sub>47</sub>-coated INPs, (A)- Hydrodynamic diameter by DLS, (B)- Diameter by TEM, (C) TGA analysis, (D)-VSM analysis, (E)- Zeta potential measurement, (F)- TEM image.

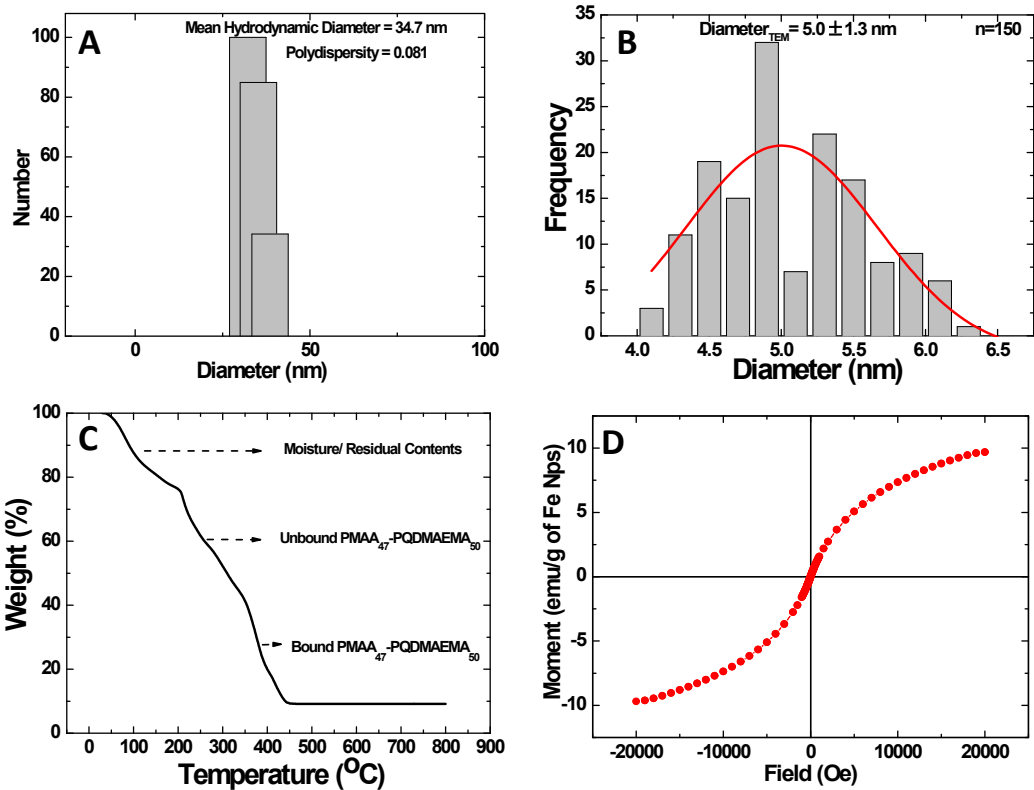

|                      |       |
|----------------------|-------|
| Diblock composition  | 76.2% |
| Iron Nps composition | 23.8% |

|                              |            |
|------------------------------|------------|
| Saturation Magnetisation, Ms | 10.0 emu/g |
| Coercivity, Hc               | 4.9 Oe     |

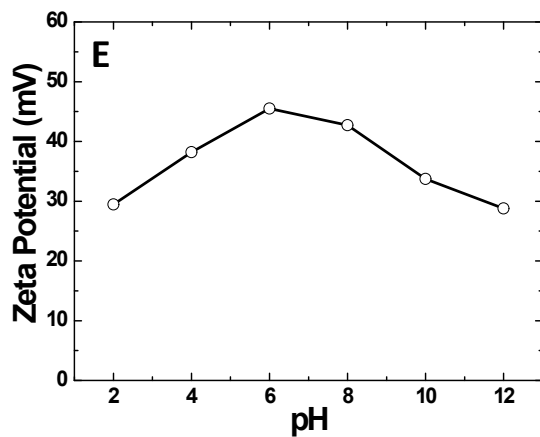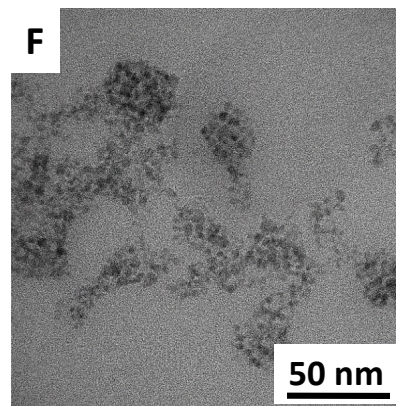

**Figure S3.** Characterization of PMAA<sub>47</sub>-b-PQDMAEMA<sub>50</sub>-coated INPs, (A)- Hydrodynamic diameter by DLS, (B)- Diameter by TEM, (C) TGA analysis, (D)-VSM analysis, (E)- Zeta potential measurement, (F)- TEM image.

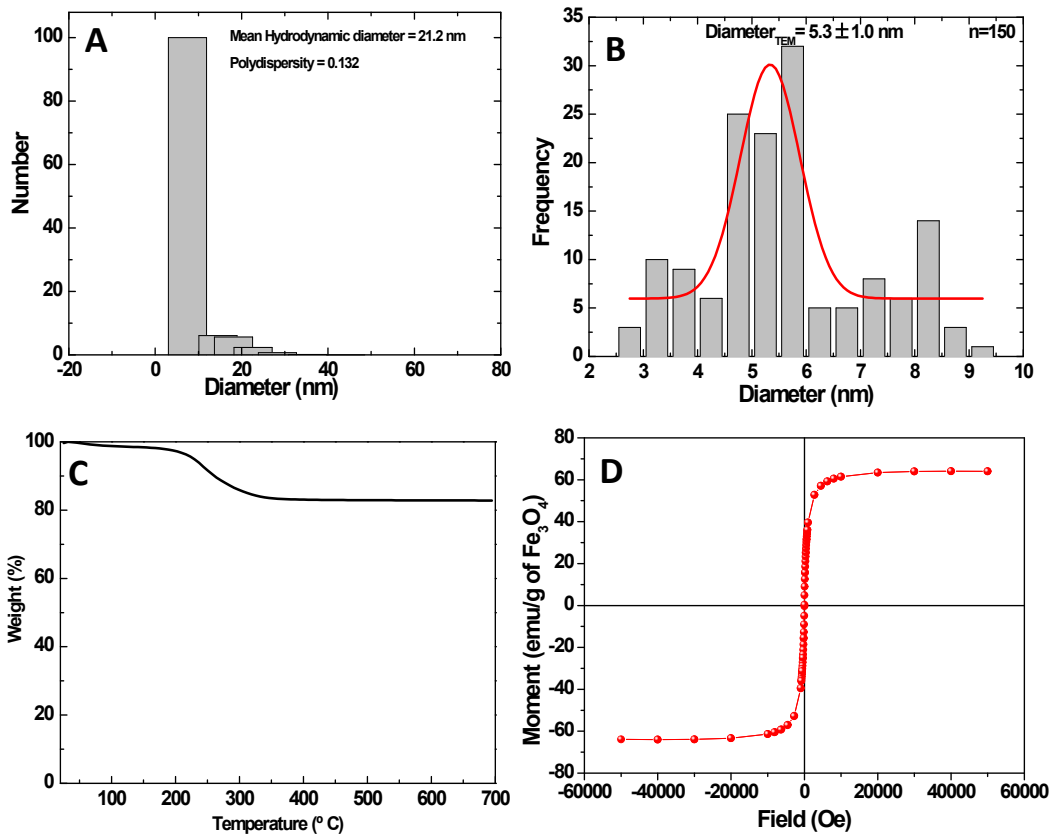

|                      |      |
|----------------------|------|
| TREG composition     | 15 % |
| Iron Nps composition | 82 % |

|                              |            |
|------------------------------|------------|
| Saturation Magnetisation, Ms | 64.0 emu/g |
| Coercivity, Hc               | 7.0 Oe     |

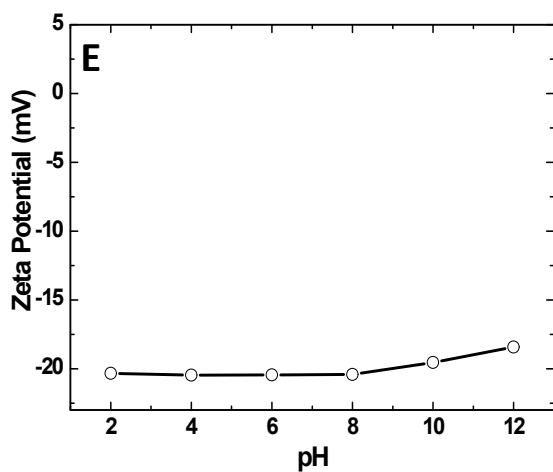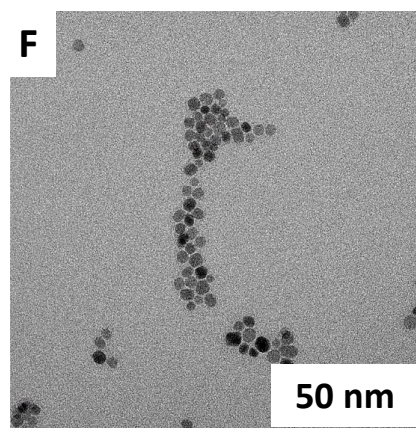

**Figure S4.** Characterization of DMSA-coated INPs, (A)- Hydrodynamic diameter by DLS, (B)- Diameter by TEM, (C) TGA analysis, (D)-VSM analysis, (E)- Zeta potential measurement, (F)- TEM image.

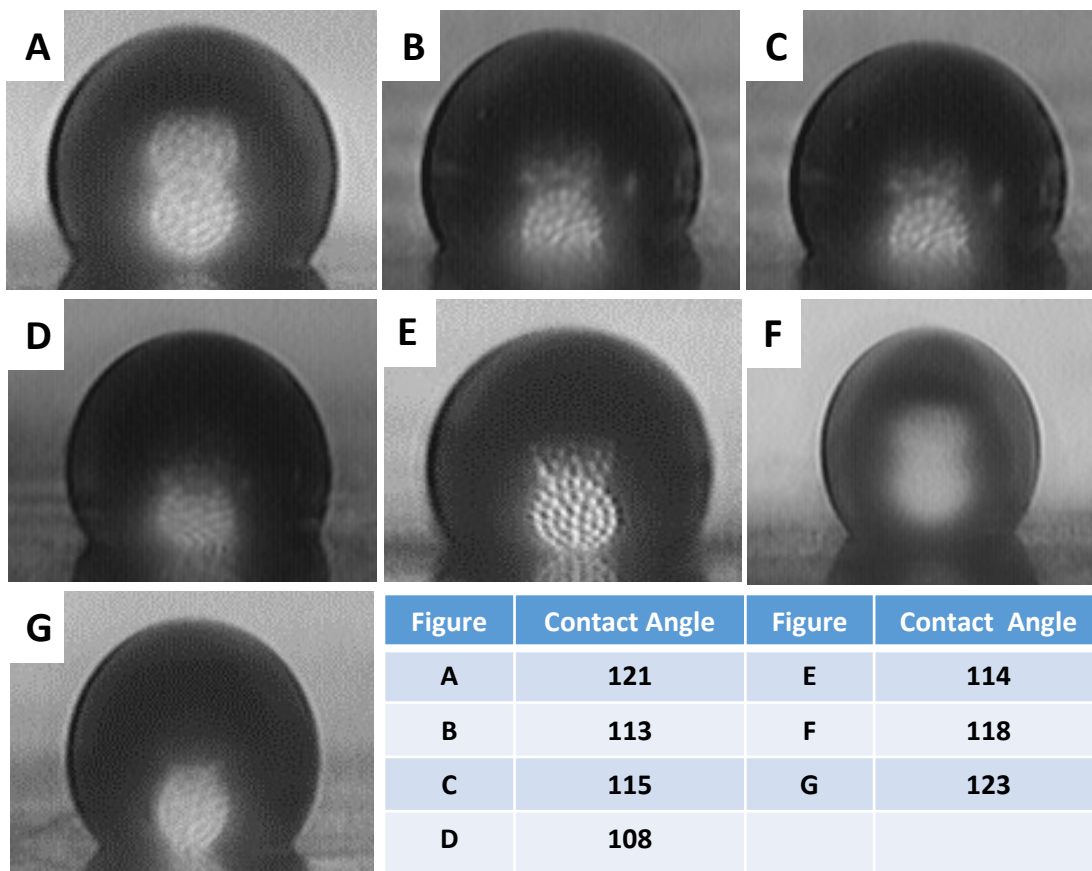

**Figure S5.** Contact angle measurement for membranes prepared from diblock copolymer in THF with (A) 0.1 mL (B) 0.2 mL (C) 0.3 mL (D) 0.4 mL (E) 0.5 mL (F) 0.6 mL (G) 0.7 mL of water.

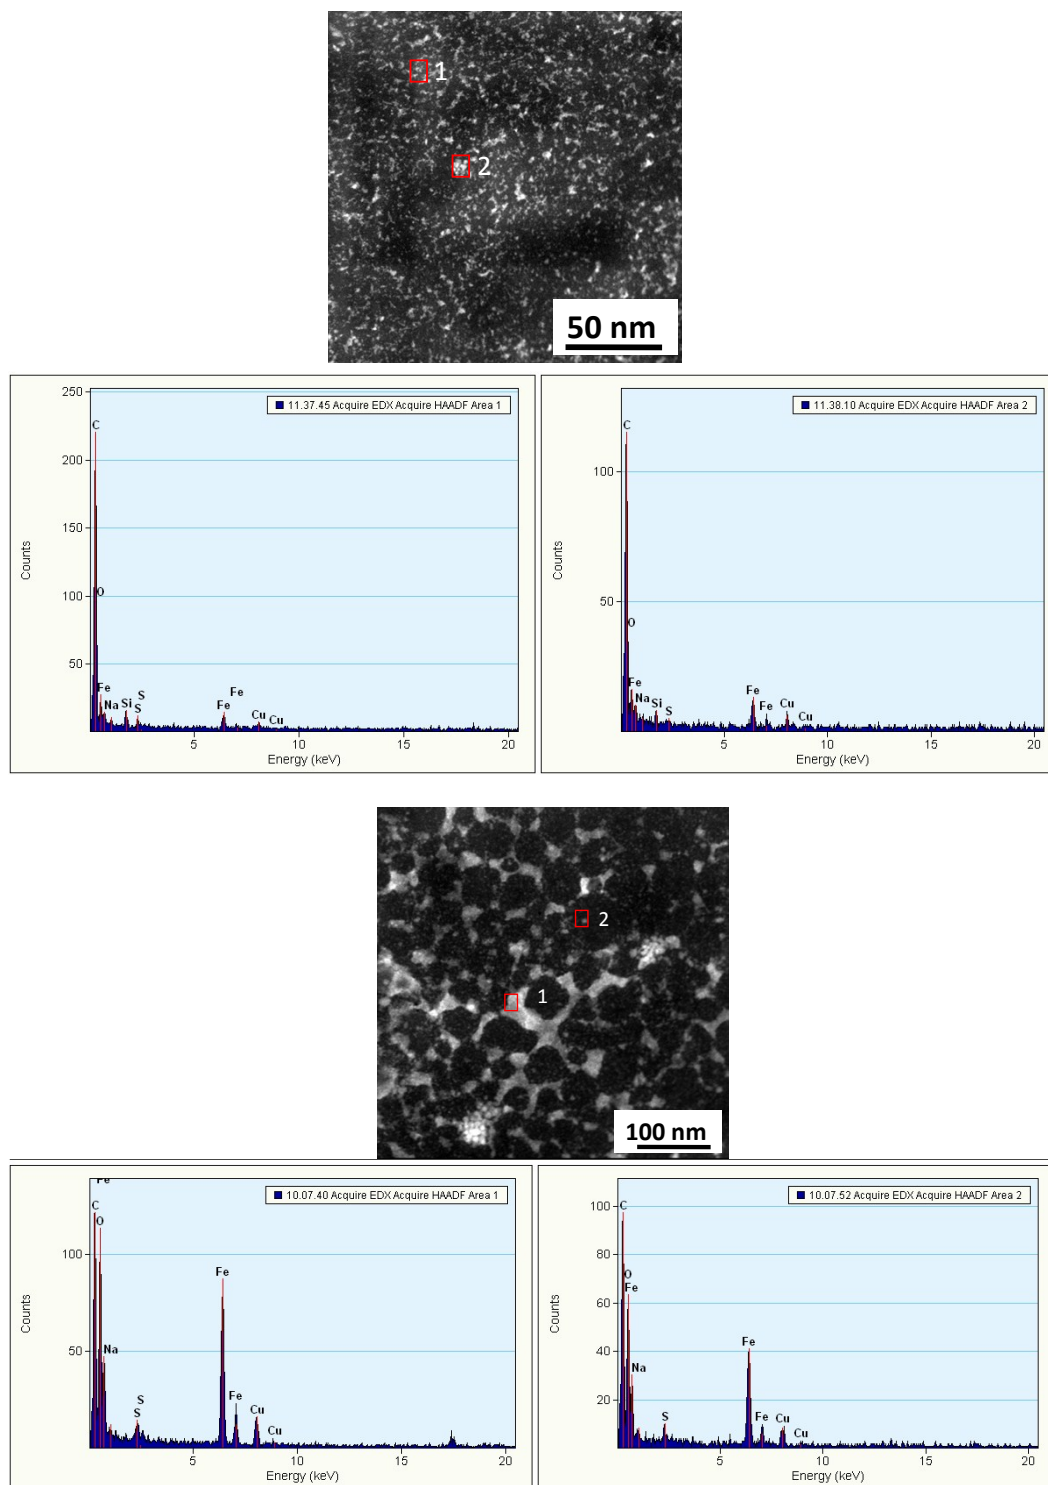

**Figure S6.** TEM EDX images of casting solution made from Diblock copolymer in THF (1.0 mL) and Iron core coated with DMSA (0.2 mL and 0.35 mL)



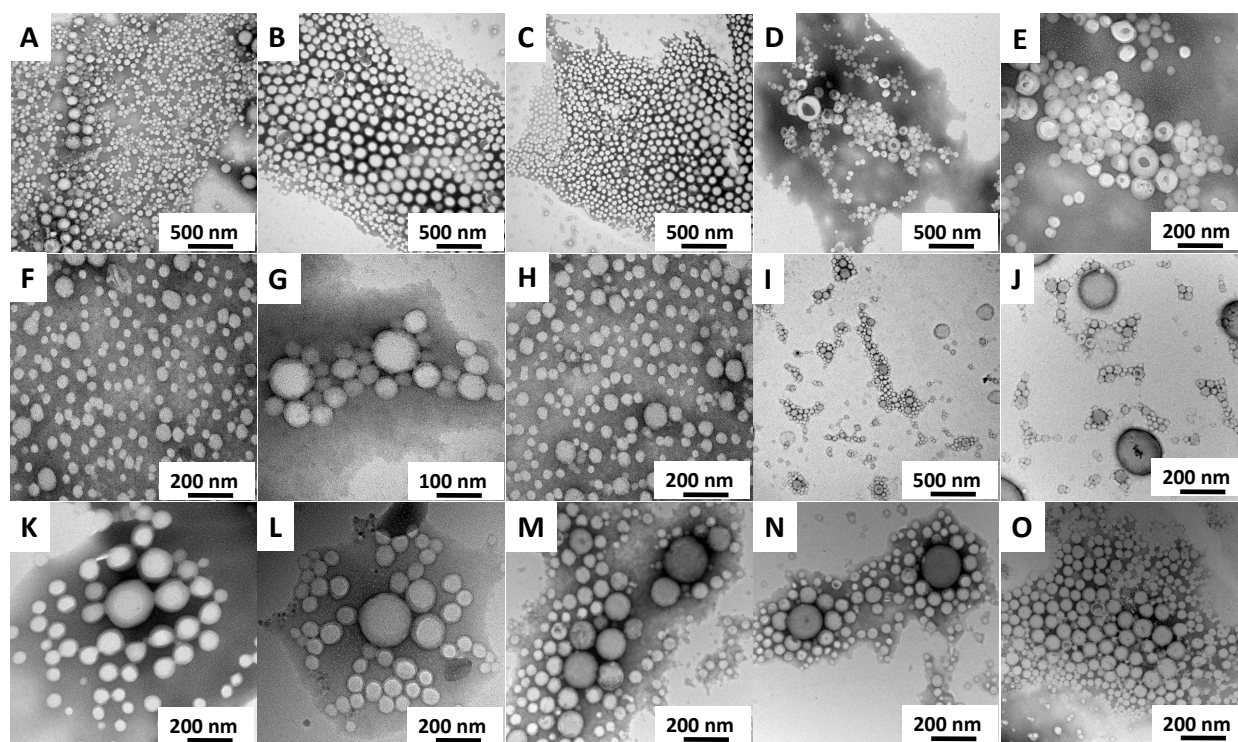

**Figure S7.** TEM images of polymeric nanoparticles formed by addition of 0.6 to 1.0 mL of water containing PMAA<sub>47</sub> covered INPs (A to E represents the samples taken every 0.1 mL of addition of bad solvent), PMAA<sub>47</sub>-PQDMAEMA<sub>50</sub> covered INPs (F to J represents the samples taken every 0.1 mL of addition of bad solvent), DMSA covered INPs (K to O represents the samples taken every 0.1 mL of addition of bad solvent), into 1 mL of diblock copolymer in THF.

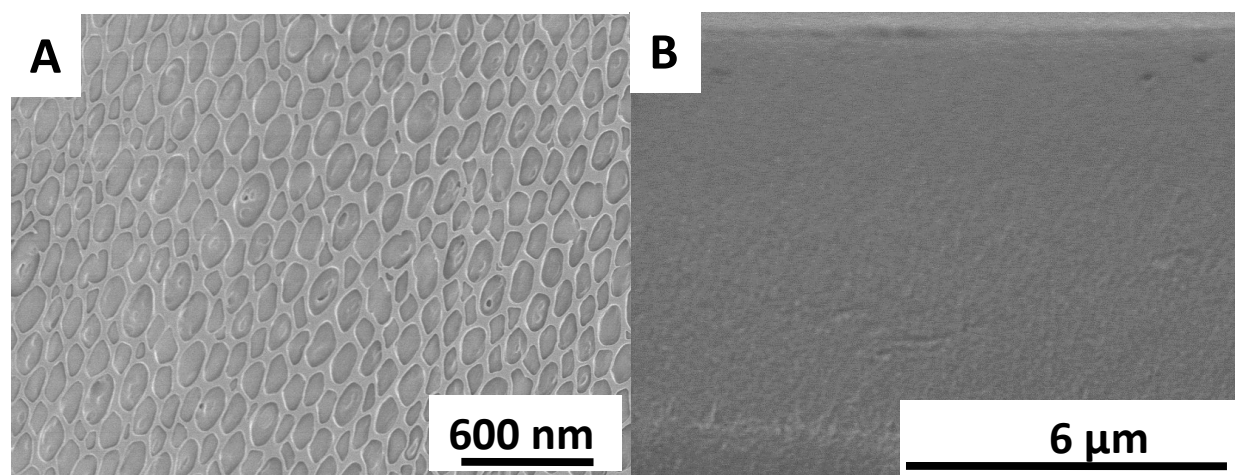

**Figure S8.** Membrane prepared from mixture of 1 mL of the diblock copolymer in THF and 2 mL of PMAA<sub>47</sub> coated INPs, fully dried before immersion in coagulation bath (A) top surface (B) cross section.

**Table S2.** Casting condition, estimated pore size and contact angle for tape casted membranes.

| Amount of INP's dispersed in water (mL)                  | Relative Humidity (%) | Drying time (s) | pH of coagulation bath | Pore diameter range (nm) | Membrane thickness ( $\mu\text{m}$ ) | Water contact angle ( $^\circ$ ) |
|----------------------------------------------------------|-----------------------|-----------------|------------------------|--------------------------|--------------------------------------|----------------------------------|
| 0.2 (INPs -PMAA <sub>47</sub> )                          | 38                    | 120             | 7.1                    | 50 - 70                  | 5.6                                  | 107                              |
| 0.35 (INPs -PMAA <sub>47</sub> )                         | 38                    | 120             | 7.1                    | 60 - 80                  | 5.9                                  | 115                              |
| 0.2 (INPs- PMAA <sub>47</sub> -PQDMAEMA <sub>50</sub> )  | 38                    | 120             | 7.1                    | 50 - 300                 | 7.3                                  | 101                              |
| 0.35 (INPs- PMAA <sub>47</sub> -PQDMAEMA <sub>50</sub> ) | 38                    | 120             | 7.1                    | 50 - 300                 | 6.6                                  | 104                              |
| 0.2 (INPs- DMSA)                                         | 38                    | 120             | 7.1                    | 18 - 370                 | 5.2                                  | 113                              |
| 0.35 (INPs- DMSA)                                        | 38%                   | 120             | 7.1                    | 32 - 400                 | 6.3                                  | 118                              |

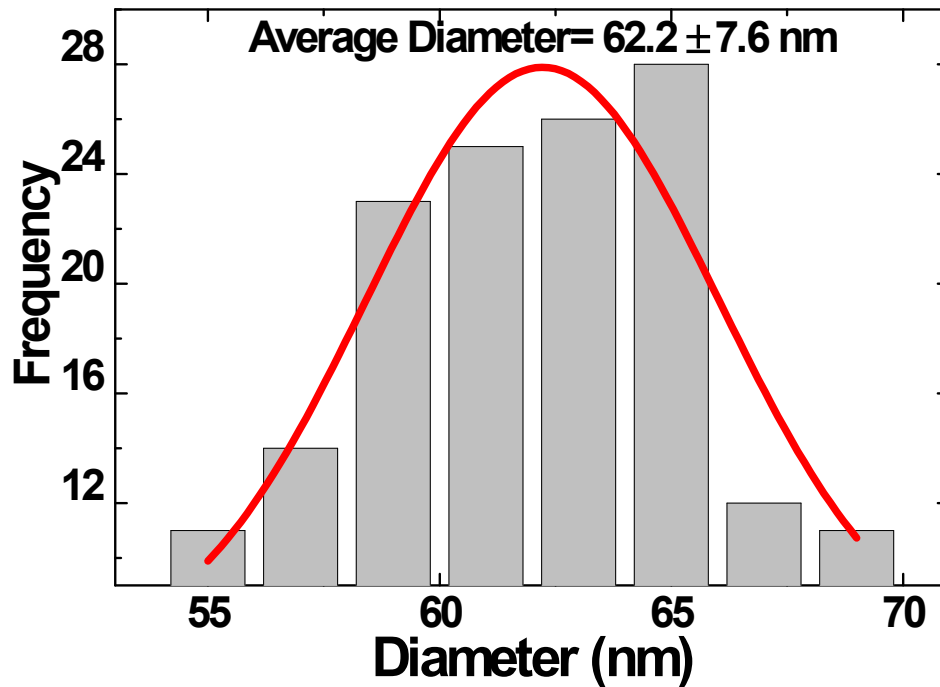

**Figure S9.** Pore size estimation for membranes from 0.2 mL of PMAA<sub>47</sub> coated INPs prepared using tape casting.

## Flux and permeability

According to Darcy's law the volumetric flux could be calculated using the following equation

$$\text{Flux } (J_v) = V_p / (t * S) \quad (\text{L. h}^{-1}.\text{m}^{-2}) \quad \text{Eqn (S1)}$$

$$\text{Permeability } (L_p) = J_v / \Delta P \quad (\text{L. h}^{-1}.\text{m}^{-2}.\text{bar}^{-1}) \quad \text{Eqn (S2)}$$

Where  $V_p$  = Permeate volume,  $t$  = Time,  $S$  = Surface area and  $\Delta P$  = pressure difference.

**Table S3.** Casting condition, estimated pore size and contact angle for spin coated membranes.

| Amount of INP's dispersed in water (mL)                   | Relative Humidity (%) | Drying time at a velocity of 1500 rpm (s) | pH of Coagulation bath | Pore diameter range (nm) | Membrane thickness ( $\mu\text{m}$ ) | Water contact angle ( $^\circ$ ) |
|-----------------------------------------------------------|-----------------------|-------------------------------------------|------------------------|--------------------------|--------------------------------------|----------------------------------|
| 0.2 (INPs -PMAA <sub>47</sub> )                           | 38                    | 90                                        | 7.1                    | 50 -70                   | 2.8                                  | 100                              |
| 0.35 (INPs -PMAA <sub>47</sub> )                          | 38                    | 90                                        | 7.1                    | 65-74                    | 2.4                                  | 117                              |
| 0.2 (INPs- PMAA <sub>47</sub> - PQDMAEMA <sub>50</sub> )  | 38                    | 90                                        | 7.1                    | 50 - 270                 | 2.6                                  | 100                              |
| 0.35 (INPs- PMAA <sub>47</sub> - PQDMAEMA <sub>50</sub> ) | 38                    | 90                                        | 7.1                    | 50 - 270                 | 2.4                                  | 92                               |
| 0.2 (INPs- DMSA)                                          | 38                    | 90                                        | 7.1                    | 50 - 400                 | 2.3                                  | 119                              |
| 0.35 (INPs- DMSA)                                         | 38                    | 90                                        | 7.1                    | 30 - 400                 | 3.2                                  | 126                              |
